# Supplementary material for: The differential effects of common and rare genetic variants on cognitive performance across development
Source: bioRxiv or medRxiv preprint supplement (doi:10.1101/2024.09.04.24313061), 2024-11-07
Supplement: Supplementary file [file media-1.pdf]

## 1 Supplementary Methods

### 2 *De novo* variant calling in ALSPAC and MCS

3 We carried out DNM calling in 1,326 trios in ALSPAC and 3,106 trios in MCS. Starting with the  
 4 unfiltered callset obtained by GATK (described in detail in our recent data note<sup>1</sup>), a set of  
 5 candidate *de novo* mutations (DNMs) was generated using ``bcftools +trio-dnm2 --use-NAIVE``  
 6 (<http://samtools.github.io/bcftools/trio-dnm.pdf>). In this mode, the program detects variants that  
 7 violate the Mendelian patterns of inheritance simply by comparing parental and proband  
 8 genotypes. However, a callset produced this way is dominated by false positives due to  
 9 sequencing, mapping or alignment artifacts. In order to filter such artifacts, the following pipeline  
 10 was used (Figure S7A):

- 11 1. Per-trio genotyping. We generated the following annotations at each candidate site using  
 12 ``bcftools mpileup -pa AD,QS,SP,SCR,FMT/NMBZ``:
  - 13 ○ AD, allelic depth, the number of reference and alternate reads observed in the  
 14 three samples
  - 15 ○ QS, phred-score allele quality sum, an auxiliary annotation used by ``bcftools +trio-  
 16 dnm2``
  - 17 ○ SP, phred-scaled strand bias P-value
  - 18 ○ SCR, number of soft-clipped reads
  - 19 ○ NMBZ, Mann-Whitney U-z test of number of mismatches within supporting reads
- 20 2. Parental genotyping. We generated profiles of parental variant allele fraction (VAF) to  
 21 identify problematic regions, as described in the section on “Parental VAF Profiles” below.
- 22 3. Obtaining posterior probabilities. We ran ``bcftools +trio-dnm2 --strictly-novel --ppl`` and ``bcftools  
 23 +trio-dnm2 --strictly-novel`` to obtain posterior *de novo* probabilities using the DeNovoGear  
 24 model<sup>2</sup> implemented in the `trio-dnm2` plugin ([http://samtools.github.io/bcftools/trio-  
 26 dnm.pdf](http://samtools.github.io/bcftools/trio-<br/>
    25 dnm.pdf)).
- 26 4. Random forest. We used random forest to score the candidate variants based on the  
 27 following covariates:
  - 28 ○ DNM, the `trio-dnm2` score
  - 29 ○ DNG, the DeNovoGear score
  - 30 ○ VCF\_QUAL, variant quality as presented in the VCF QUAL column
  - 31 ○ MaxParentalVAF, maximum variant allele frequency (VAF) observed across  
 32 parents at this site
  - 33 ○ NMBZ, Mann-Whitney U-z test of number of mismatches in variant reads
  - 34 ○ SCR, number of soft-clipped reads
  - 35 ○ SCBZ, Mann-Whitney U-z test of number of soft-clips in variant reads
  - 36 ○ MQBZ, Mann-Whitney U-z test of mapping quality of variant reads

37 The random forest classifier was trained on a subset of calls manually inspected in IGV  
 38 (Integrative Genomics Viewer)<sup>3</sup>, separately for SNVs, deletions and duplications, and for  
 39 autosomal and sex chromosomes in male and female samples. It was run with 100 trees  
 40 in the forest and the relative contributions of the classification annotations are shown in  
 41 Figure S7B.

- 42 5. Iterative manual curation and retraining of the random forest. We randomly selected 100  
 43 variants and curated them manually to extend the truth set, then re-trained the random  
 44 forest classifier. We repeated this and the previous step 3-4 times until the random forest  
 45 quality score separates clearly real from clearly false positive DNMs well.
- 46 6. We applied the following final filters:
- 47 ○ In both ALSPAC and MCS
    - 48 ■ exclude any variants with population allele frequency 1% or higher  
 49 (gnomAD v2.1)
    - 50 ■ exclude variants with parental depth lower than 8 reads
    - 51 ■ filter variants observed across unrelated parents, assessed with the  
 52 LNP\_VAF metric (log-normal probability of matching parental VAF profiles;  
 53 i.e. we required  $LNP\_VAF > -1000$ , see the section on “Parental VAF  
 54 Profiles” below)
  - 55 ○ In ALSPAC
    - 56 ■ require random forest score bigger than 0.92
    - 57 ■ restrict C>A and G>T calls that passed stringent QC applied to the whole-  
 58 exome data, due to a known sequencing artifact in the dataset<sup>1</sup>
  - 59 ○ In MCS
    - 60 ■ require random forest score bigger than 0.6
    - 61 ■ require VAF  $\geq 25\%$

62 Note that different filters were applied in the two cohorts since they were differentially affected by  
 63 a sequencing artifact described in the data note<sup>1</sup>.

## 64 Parental VAF Profiles

65 The LNP\_VAF annotation (log-normal probability of matching parental variant allele fraction  
 66 profiles) is intended to filter sites in difficult regions by comparing the VAF profile in unrelated  
 67 parents with the expected distribution. It is assumed that alternate reads in parents unrelated to  
 68 the index proband represent sequencing errors. The method identifies a set of high-confidence  
 69 *de novo* variants (i.e. sites with DNM score equal to 0) with sufficient coverage in all three trio  
 70 samples ( $\geq 15x$ ), proband VAF  $> 30\%$ , and no alternate reads in the index proband's parents.  
 71 For each such site, a VAF distribution is collected across all parents in the dataset who are  
 72 unrelated to the proband of interest, and the mean  $\mu$  and variance  $\sigma$  are determined across all  
 73 sites for each bin of the distribution. The log-normal score is then calculated as follows:  
 74  $LNP\_VAF = -\sum_{i=1}^N (x_i - \mu_i)^2 / \sigma_i^2$ , where  $N=50$  is the number of bins of the VAF distribution.  
 75 It was then used in the filtering described above.

## 76 DNM callset summary and evaluation

77 The expected numbers of DNMs in different consequence classes were estimated per-gene for  
 78 MANE transcripts from a sequence context-based mutational model<sup>4</sup>. The cumulative rates of  
 79 expected DNMs per parental genome were as follows:

- 80 ● synonymous: 0.160734,
- 81 ● missense: 0.364192,
- 82 ● loss-of-function, including stop gained, stop lost, start lost, splice acceptor, and  
 83 splice donor consequence predictions: 0.0277504,
- 84 ● stop gain: 0.0181173,

85 • frameshift:1.2\*expected number of stop gain  
 86 In calculating the total expected number of DNMs in the dataset, the proportion of male vs female  
 87 samples was taken into account as follows:  $2 * n_{\text{Samples}} * \text{dnm\_rate}$  for autosomal chromosomes  
 88 and  $(n_{\text{Males}} + 2 * n_{\text{Females}}) * \text{dnm\_rate}$  for chrX. Pseudoautosomal regions were not considered in  
 89 the calculation.

90  
 91 The mutation spectrum and distribution of parental VAF per dataset are shown in Figure S8, and  
 92 the comparison of observed to expected DNMs in each consequence class in Figure S9. The  
 93 number of DNMs in any one class or dataset did not differ significantly from the expected number,  
 94 with the exception of missense mutations of which we observed a slight excess in MCS.

## 95 Gene set associations and enrichment

96 To derive gene set-specific associations (Extended Data Figure 5, Figure S5, Figure S6), we  
 97 conducted mixed-effect linear modeling identically as above, restricting the  $\text{RVB}_{\text{pLoF}}$  calculation to  
 98 genes only present in a given gene set. To make the effects comparable between gene sets of  
 99 varying sizes, we divided the effects by the number of genes in the gene set.

100  
 101 To derive gene set-specific enrichment for a given gene set  $g$  of size  $n$ , we randomly sampled  $n$   
 102 genes not in  $g$  to generate a matched gene set  $h$ . To ensure that the distribution of heterozygous  
 103 PTV selection coefficients in  $h$  is similar to  $g$ 's, we first calculated the 5-quantiles of the selection  
 104 coefficient distribution of  $g$  and sampled  $n/5$  genes from each quantile, rounded to the nearest  
 105 upper whole integer. We then calculated a  $h$  specific  $\text{RVB}_{\text{pLoF}}$  and repeated the analyses above,  
 106 repeating this procedure 100 times. We then combined the estimates of the 100 gene sets using  
 107 Rubin's rule. Enrichment was calculated as the ratio of the  $\text{RVB}_{\text{pLoF}}$  effects for  $g$  and the pooled  
 108 effects for  $h$ . Significance was determined using a Wald test.

## 109 Supplementary Tables

110 Table S1

| Factor loading                | Key stage 2 (ALSPAC) | Key Stage 3 (ALSPAC) |
|-------------------------------|----------------------|----------------------|
| Math                          | 0.87                 | 0.91                 |
| Science                       | 0.89                 | 0.94                 |
| English                       | 0.81                 | 0.77                 |
| Proportion variance explained | 0.74                 | 0.77                 |

111 Key stage factor loadings and proportion of variance explained by one factor model on academic  
 112 performance in ALSPAC.

113 Table S2

| IQ measure | Heritability | $r_g$ with age 4 | $r_g$ with age 8 | n     | IQ imputation status |
|------------|--------------|------------------|------------------|-------|----------------------|
| Age 8      | 0.46 (0.154) | -                | -                | 3,176 | pre-imputation       |
| Age 16     | 0.73 (0.153) | -                | 0.96 (0.042)     | 3,176 | pre-imputation       |
| Age 4      | 0.46 (0.081) | -                | -                | 6,495 | post-imputation      |
| Age 8      | 0.48 (0.080) | 0.97 (0.021)     | -                | 6,495 | post-imputation      |
| Age 16     | 0.56 (0.080) | 0.96 (0.024)     | 0.96 (0.031)     | 6,495 | post-imputation      |

114 Heritabilities and genetic correlations of the IQ measures in ALSPAC pre- and post-imputation,  
 115 estimated using GREML-LDMS<sup>5</sup>, with standard errors shown in brackets. Genetic correlations  
 116 were estimated between post-imputation IQ measures or between pre-imputation IQ measures.  
 117 GREML-LDMS estimates of heritability at age 4 pre-imputation are missing from this table as they  
 118 did not converge. Estimates of heritabilities and genetic correlation between IQ at age 8 and 16  
 119 pre-imputation were calculated in unrelated individuals that had both measures.

120 Table S3

| IQ measure | $r_g$ with EA | $r_g$ with Cog | $r_g$ with NonCog |
|------------|---------------|----------------|-------------------|
| Age 4      | 0.903 (0.065) | 0.863 (0.062)  | 0.416 (0.077)     |
| Age 8      | 1.118 (0.081) | 0.952 (0.071)  | 0.629 (0.089)     |
| Age 16     | 0.977 (0.068) | 0.878 (0.061)  | 0.502 (0.076)     |

121 Genetic correlations of the post-imputation IQ measures in ALSPAC with external GWASs using  
 122 LDSC<sup>6</sup>, with standard errors in brackets.

123

124 Table S4

125 PGI effects for cross-sectional and mixed-effects models on IQ in ALSPAC. First column indicates  
 126 the PGI being assessed in the regression, second column indicates whether the effect is the  
 127 proband's population or direct effect estimate or the paternal/maternal effect estimate from a trio  
 128 model, columns three through five indicate the effect size, standard error, and the p value,  
 129 respectively, the sixth column indicates whether it was a cross-sectional or mixed-effects model,  
 130 the seventh column indicates for a cross-sectional model the age at which the IQ test was  
 131 administered or for a mixed-effects model whether it is an estimate of the main or age interaction  
 132 effect, the eighth column indicates whether the regression was conducted before or after  
 133 imputation of IQ measures, and the ninth column indicates whether the regression was conducted  
 134 in the full cohort or the trio subset.

135

## 136 Table S5

137 PGIs effects on academic performance in ALSPAC. First column indicates the PGI being  
138 assessed in the regression, second column indicates whether the effect is the proband's  
139 population or direct effect estimate or the paternal/maternal effect estimate from a trio model,  
140 columns three through five indicate the effect size, standard error, and the p value, respectively,  
141 the sixth column indicates the year at which the exams were administered or whether it is the age  
142 interaction estimated by taking the difference the scaled academic performance measures.

143

## 144 Table S6

145 RVB effects for cross-sectional and mixed-effects models on IQ in ALSPAC. First column  
146 indicates the RVB being assessed in the regression, second column indicates whether the effect  
147 is the proband's population or direct effect estimate or the paternal/maternal effect estimate from  
148 a trio model, columns three through five indicate the effect size, standard error, and the p value,  
149 respectively, the sixth column indicates whether it was a cross-sectional or mixed-effects model,  
150 the seventh column indicates for a cross-sectional model the age at which the IQ test was  
151 administered or for a mixed-effects model whether it is an estimate of the main or age interaction  
152 effect, the eighth column indicates whether the regression was conducted before or after  
153 imputation of IQ measures, and the ninth column indicates whether the regression was conducted  
154 in the full cohort or the trio subset.

155

## 156 Table S7

157 RVB effects on academic performance in ALSPAC. First column indicates the RVB being  
158 assessed in the regression, second column indicates whether the effect is the proband's  
159 population or direct effect, columns three through five indicate the effect size, standard error, and  
160 the p value, respectively, the sixth column indicates the year at which the exams were  
161 administered or whether it is the age interaction estimated by taking the difference the scaled  
162 academic performance measures.

163

## 164 Table S8

165 Quantile regression cross-sectional and mixed-effects model results for PGI and RVB effects on  
166 IQ in ALSPAC. First column indicates the PGI (EA, Cog, or Noncog) /RVB (pLoF or Missense)  
167 being assessed in the regression, second column indicates whether the effect is the proband's  
168 population or direct effect estimate or the paternal/maternal effect estimate from a trio model,  
169 columns three through five indicate the effect size, standard error, and the p value, respectively,  
170 the sixth column indicates whether it was a cross-sectional or mixed-effects model, the seventh  
171 column indicates for a cross-sectional model the age at which the IQ test was administered or for  
172 a mixed-effects model whether it is an estimate of the main or age interaction effect, the eighth  
173 column indicates the quantile being assessed, the ninth column indicates whether the regression  
174 was conducted before or after imputation of IQ measures, and the tenth column indicates whether  
175 the regression was conducted in the full cohort or the trio subset.

176

## 177 Table S9

178 Quantile regression and difference in effects for PGI and RVB effects on academic performance  
179 in ALSPAC. First column indicates the PGI (EA, Cog, or Noncog) /RVB (pLoF or Missense) being  
180 assessed in the regression, second column indicates whether the effect is the proband's  
181 population or direct effect estimate or the paternal/maternal effect estimate from a trio model,  
182 columns three through five indicate the effect size, standard error, and the p value, respectively,  
183 the sixth column indicates the year at which the exams were administered or whether it is the age  
184 interaction estimated by taking the difference the scaled academic performance measures, the  
185 seventh column indicates the quantile being assessed.

186

## 187 Supplementary Figures

188 Figure S1

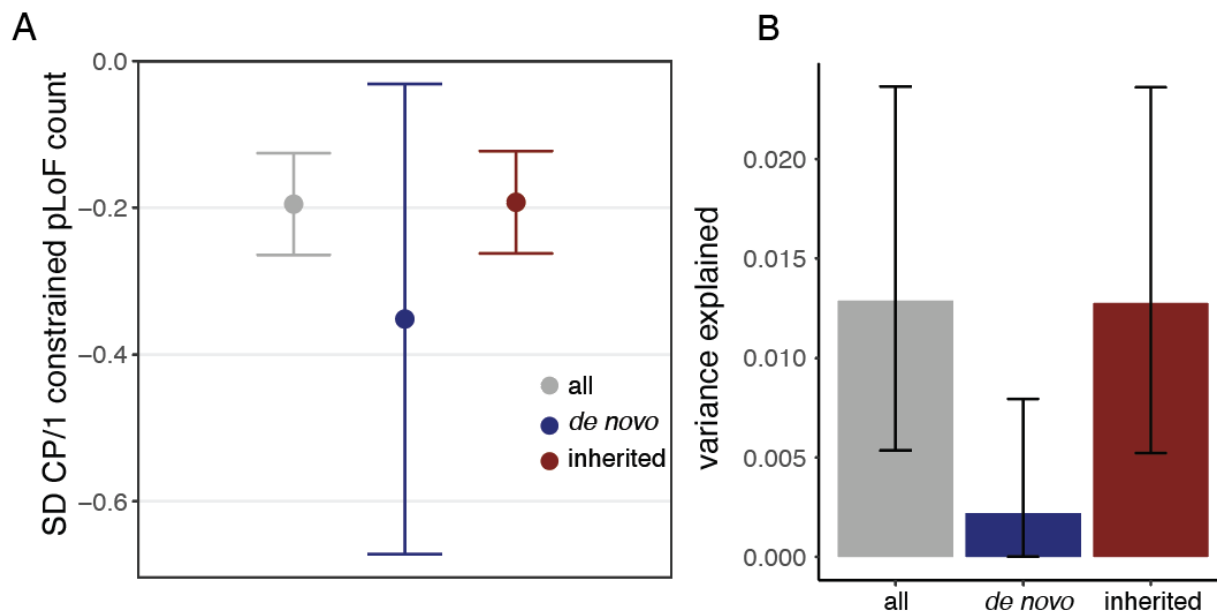

189 Association between inherited and *de novo* pLoF variant counts in constrained genes and composite  
190 cognitive performance scores in MCS. A) Standardized effects for the main and RVB-by-age interaction  
191 effect from a longitudinal mixed-effects model of constrained pLoF counts on standardized cognitive  
192 performance scores when considering all variants or *de novo* mutations and inherited variants separately.  
193 B) Variance explained by constrained pLoF counts when considering all variants or *de novo* and inherited  
194 variants separately.  
195

196 Figure S2

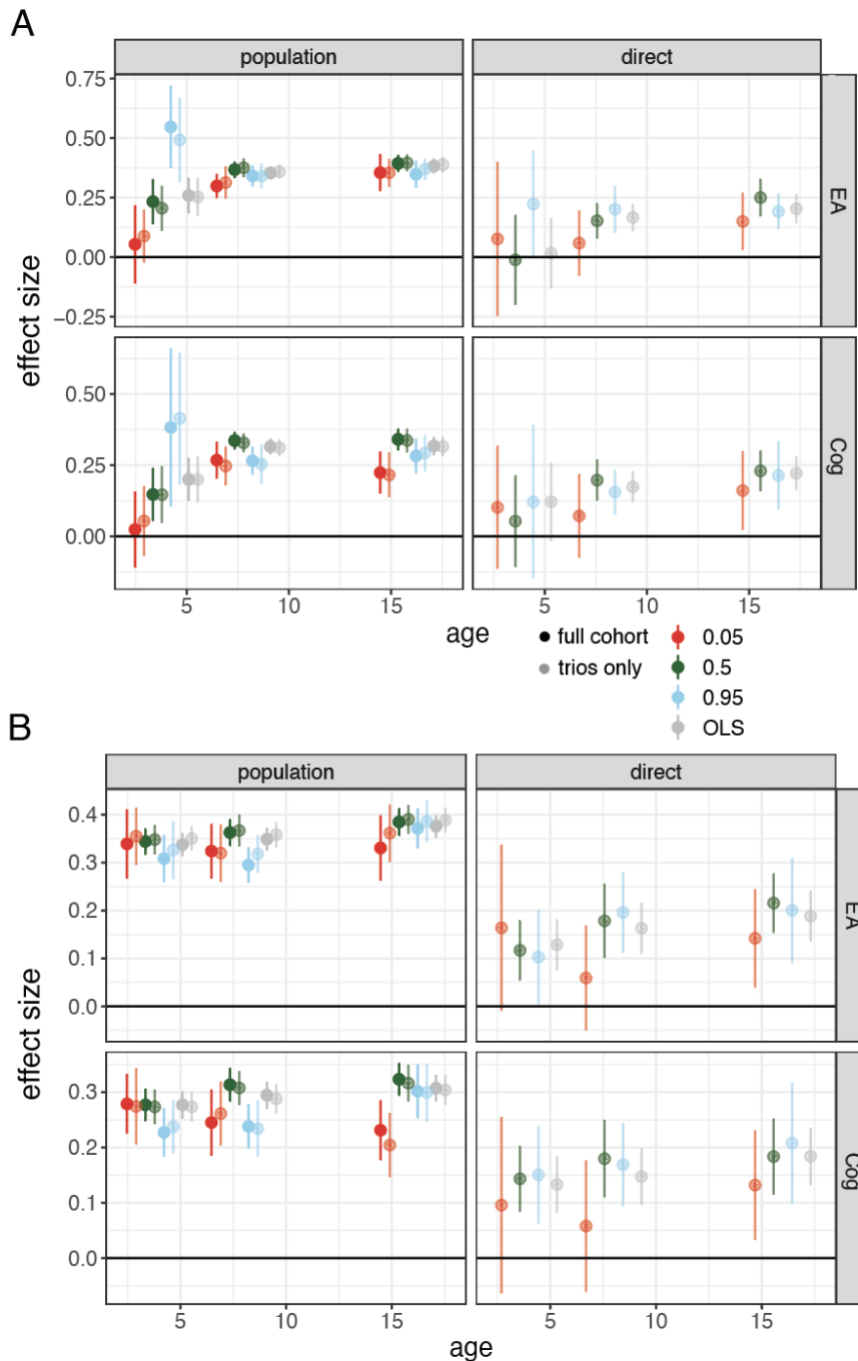

197  
 198 Influence of PGIs on different quantiles of the IQ distribution in ALSPAC estimated by applying quantile  
 199 regression in cross-sectional analyses. A) Results using pre-imputation IQ measures. Standardized effects  
 200 and 95% confidence intervals for quantile regression of the 5th (red), 50th (green), and 95th (blue)  
 201 percentiles and ordinary least squares (OLS) linear regression (gray) estimated from cross-sectional  
 202 associations with pre-imputation IQ at ages 4, 8, and 16 for PGI<sub>EA</sub> and PGI<sub>Cog</sub> before (left) and after  
 203 controlling for parental genetic measures. B) Same as (A) using post-imputation IQ measures.  
 204



205 Figure S3

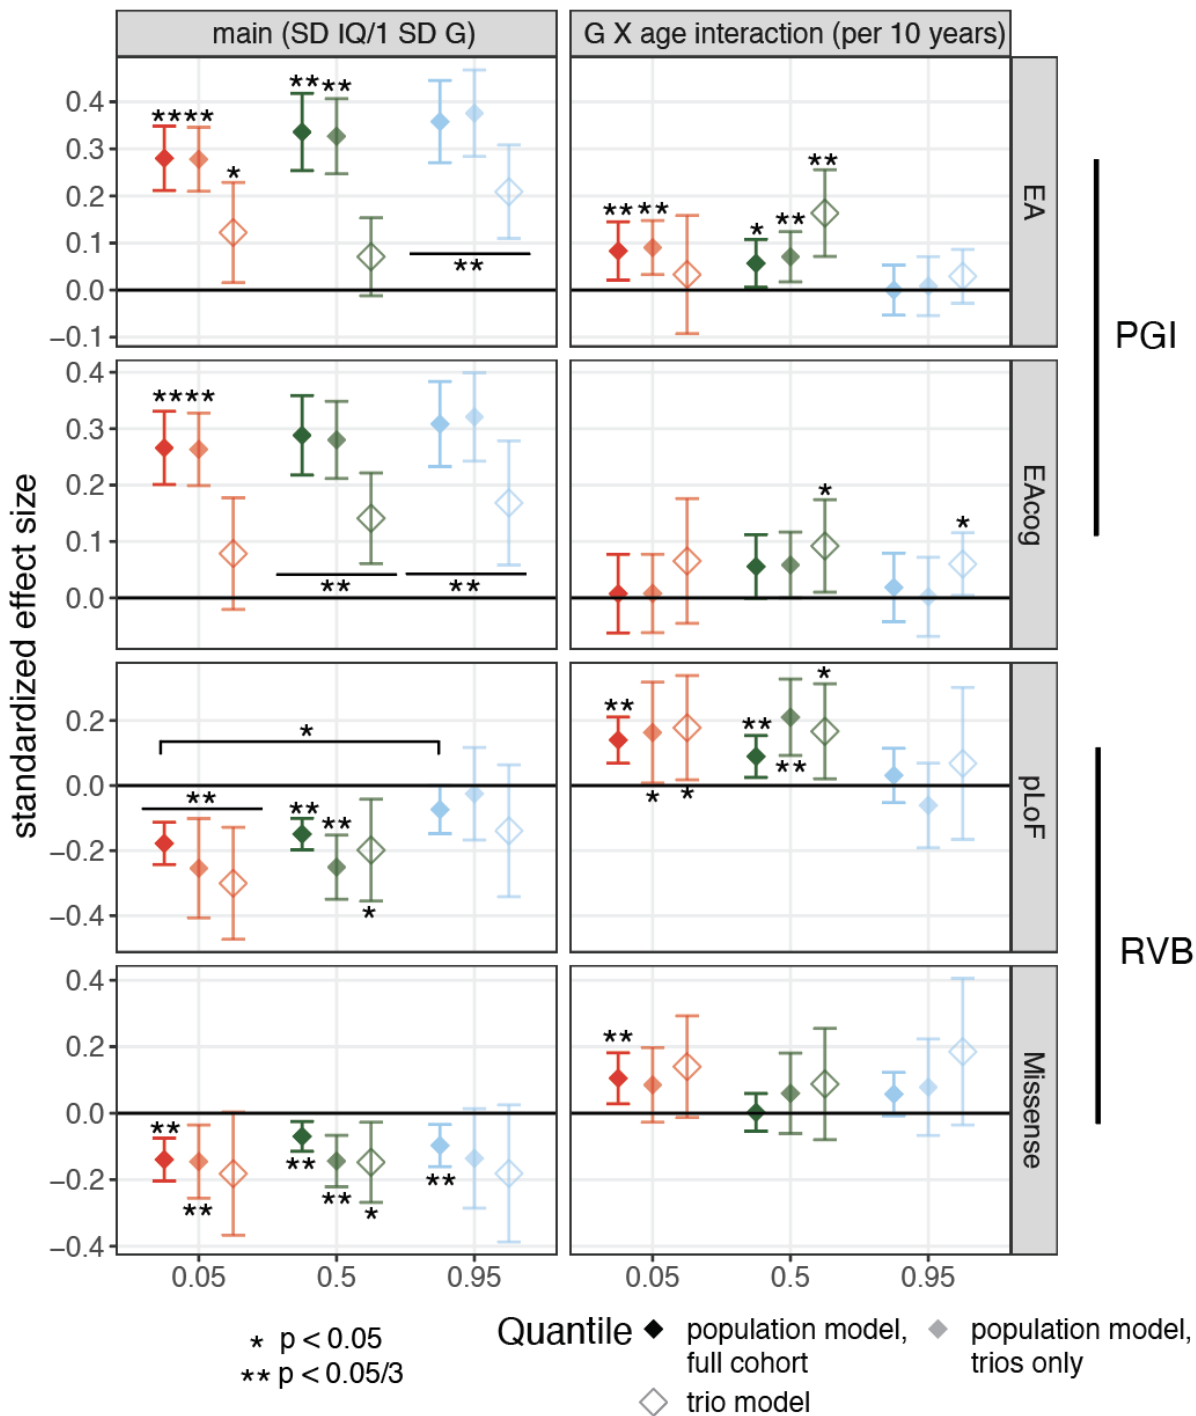

206  
 207 Influence of common and rare variants on different quantiles of the IQ distribution pre-imputation. (As for  
 208 Figure 3BC, which is based on post-imputation IQ.) Standardized effects and 95% confidence intervals for  
 209 quantile regression of the 5th, 50th, and 95th percentiles estimated from mixed-effects modeling with pre-  
 210 imputation IQ at ages 4, 8, and 16 for PGI<sub>EA</sub>, PGI<sub>Cog</sub>, RVBS<sub>pLoF</sub> and RVBS<sub>Missense</sub> before (left) and after

211 (right) controlling for parental genetic measures. The square brackets indicate significant comparisons  
 212 highlighted in the text (z tests).

213 Figure S4

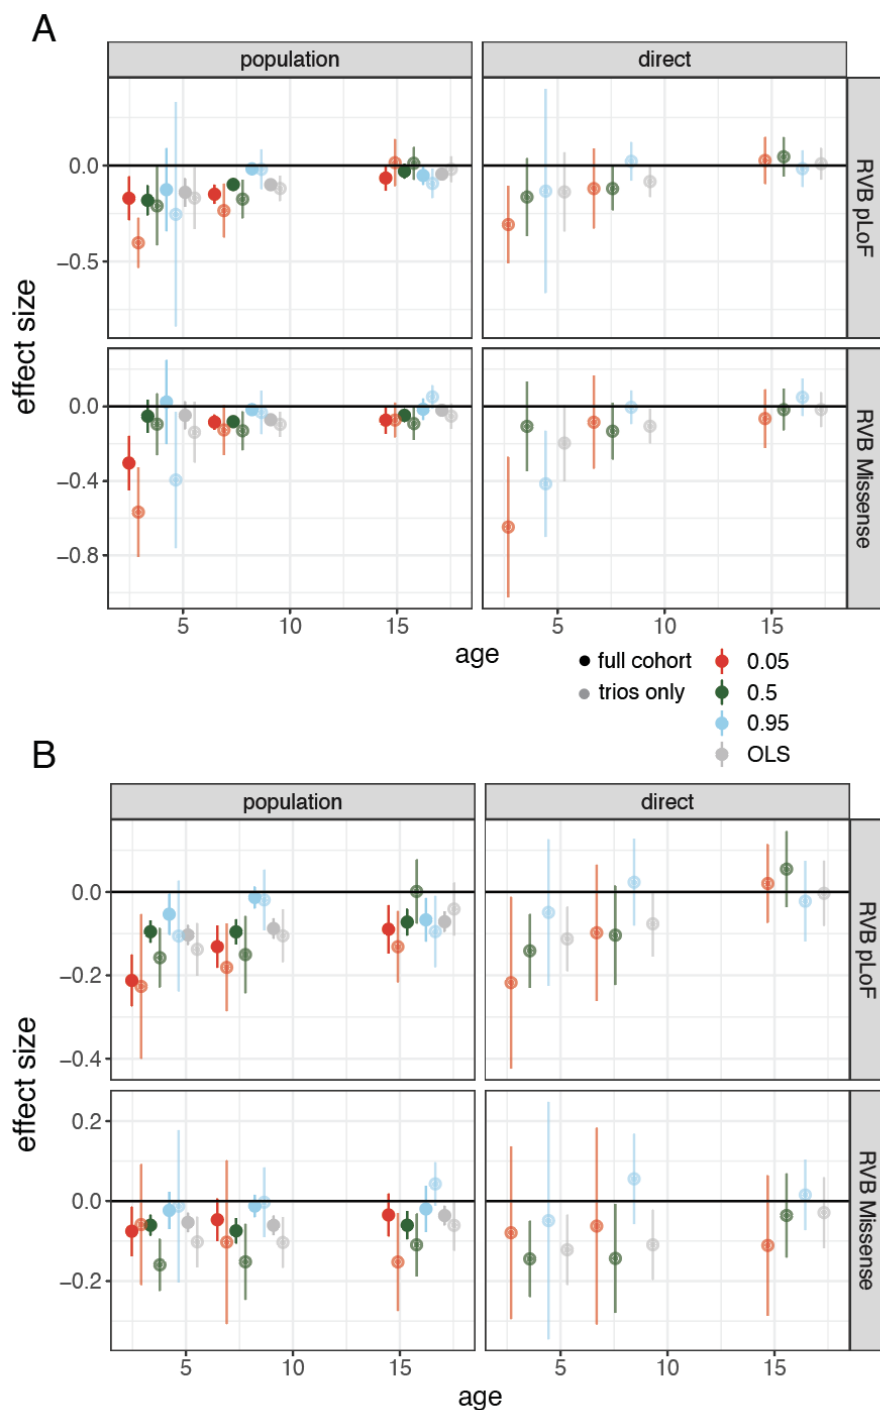

214 Influence of RVB on different quantiles of the IQ distribution using pre-imputation IQ measures in ALSPAC,  
 215 from cross-sectional analyses. A) Standardized effects and 95% confidence intervals for quantile  
 216 regression of the 5th (red), 50th (green), and 95th (blue) percentiles and ordinary least squares (OLS)  
 217

218 regression (gray) estimated from cross-sectional associations with pre-imputation IQ at ages 4, 8, and 16  
 219 for  $PGL_{EA}$  and  $PGL_{CoG}$  before (left) and after (right) controlling for parental genetic measures. B) Same as  
 220 (A) using post-imputation IQ measures.

221 Figure S5

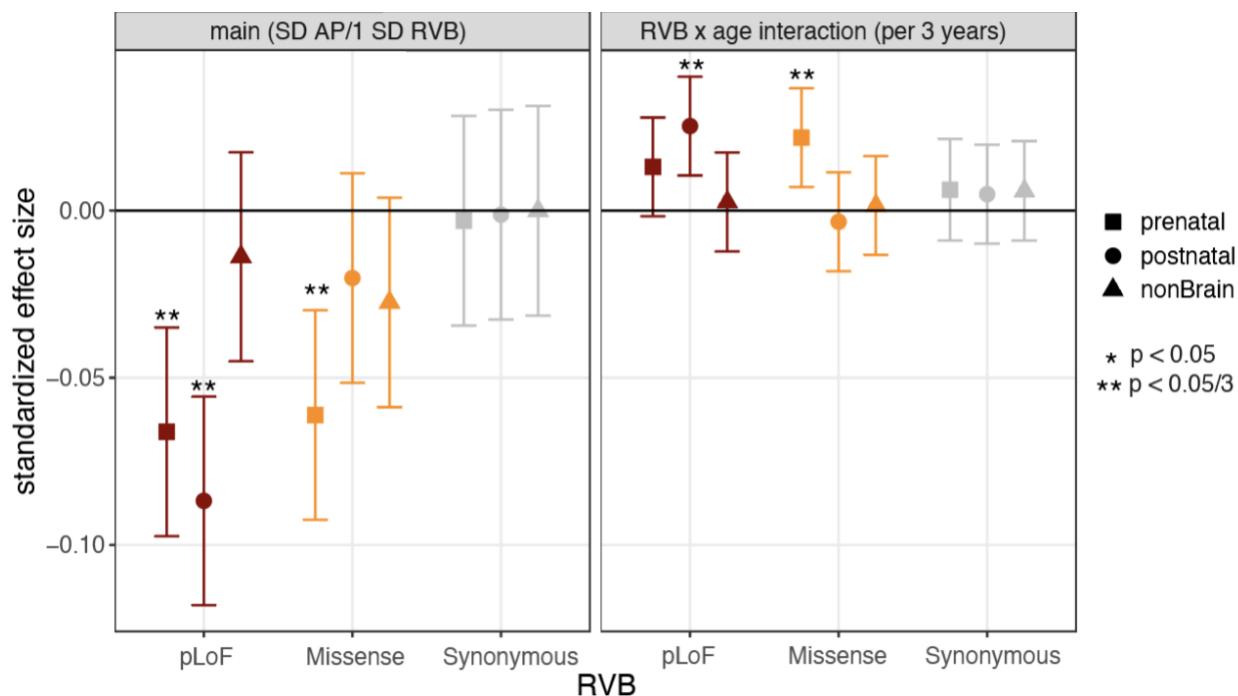

222  
 223 Associations between RVB in gene sets defined according to their expression patterns and academic  
 224 performance in ALSPAC. (Similar to Extended Data Figure 5A which shows results for IQ in ALSPAC.)  
 225 Standardized effects and 95% confidence intervals estimated for main effects on academic performance  
 226 and RVB-by-age-interaction effects for each RVB in three mutually exclusive gene sets from Li et al. These  
 227 comprise genes in co-expressed clusters that are more highly expressed in prenatal or postnatal brain or  
 228 that are not detected in the study (non-brain).

229  
 230

231 Figure S6

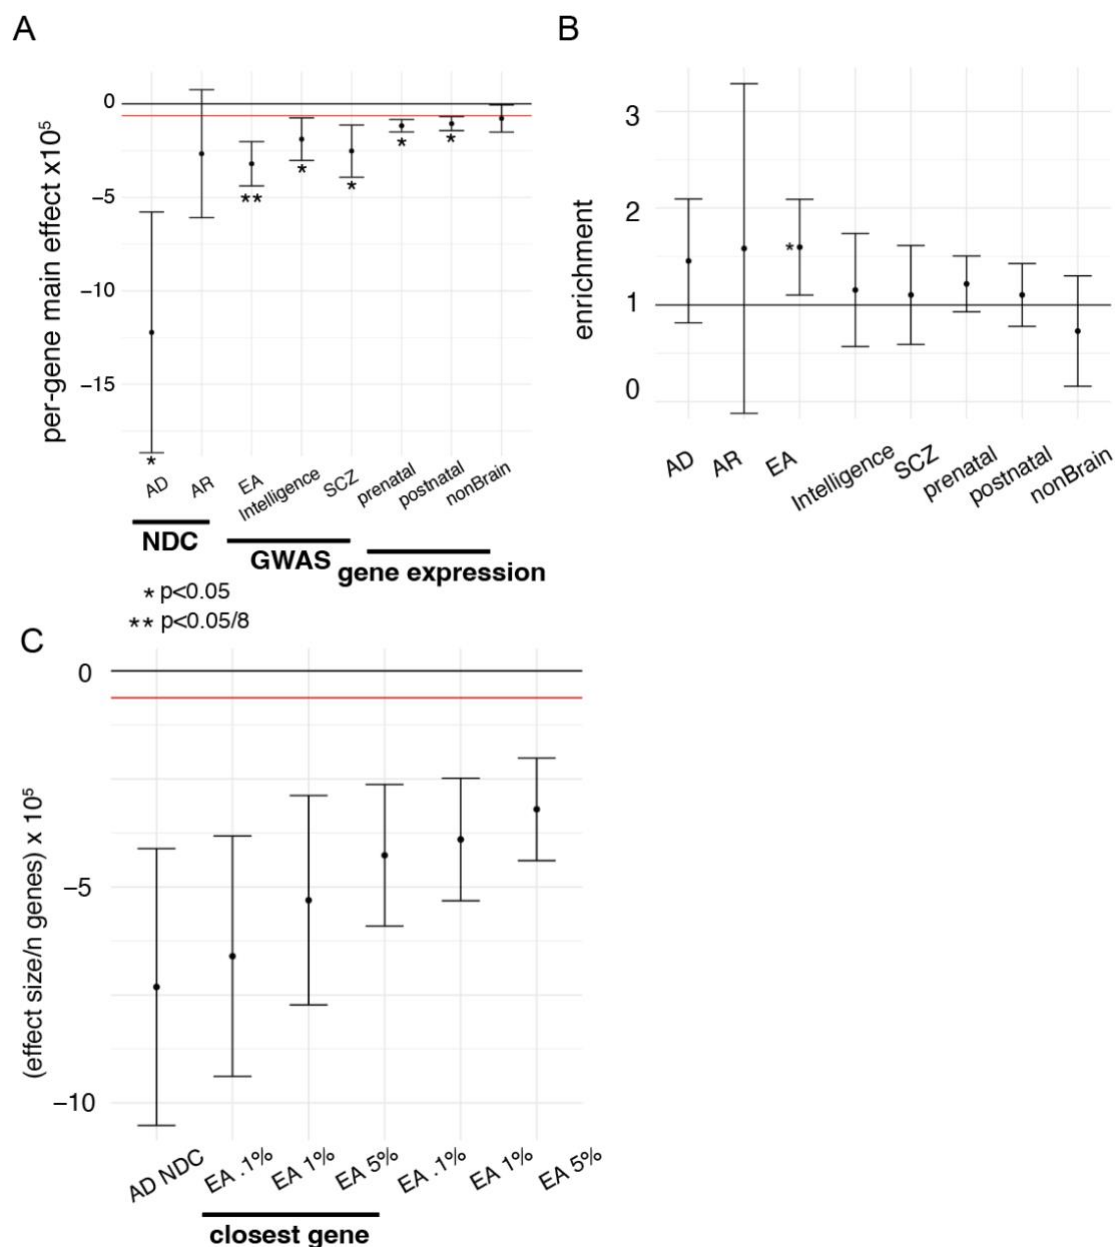

232  
 233 Replication of effects of gene set-specific RVB on composite cognitive performance measure in MCS.  
 234 (Similar to Extended Data Figure 5BDE which show results using the main effect from mixed-effect models  
 235 fitted on IQ in ALSPAC.) A) Effects of  $RVB_{pLoF}$  on composite cognitive performance score stratified by gene  
 236 set, divided by the number of genes in the given gene set, with 95% confidence intervals. Red horizontal  
 237 line indicates the average effect for  $RVB_{pLoF}$  across all genes. Asterisks indicate the p-value for difference  
 238 in per-gene effects between a given gene set and all genes using a z test, with \* indicating nominal  
 239 significance and \*\* indicating Bonferroni significance for 8 tests. B) Ratio of the main effect for  $RVB_{pLoF}$   
 240 for the indicated gene set relative to randomly sampled gene sets with matching underlying  $S_{het}$  distributions  
 241 (enrichment). C) Per-gene main effect for  $RVB_{pLoF}$  using different gene FDR threshold cutoffs based on  
 242 gene prioritization in Lee et al. and by restricting to prioritized genes at a given cutoff that are also the  
 243 nearest genes to the prioritizing SNP in the Lee et al. GWAS<sup>7</sup>. AD/AR NDC: Autosomal dominant/recessive

244 neurodevelopmental disorder genes with loss-of-function mechanism from DDG2P<sup>8</sup>, EA 5%: educational  
245 attainment GWAS prioritized genes by Lee et al.<sup>7</sup> at 5% FDR threshold, IQ: intelligence GWAS prioritized  
246 genes from Savage et al.<sup>9</sup>, SCZ: schizophrenia GWAS prioritized genes from Pardiñas et al.<sup>10</sup>  
247  
248

249 Figure S7

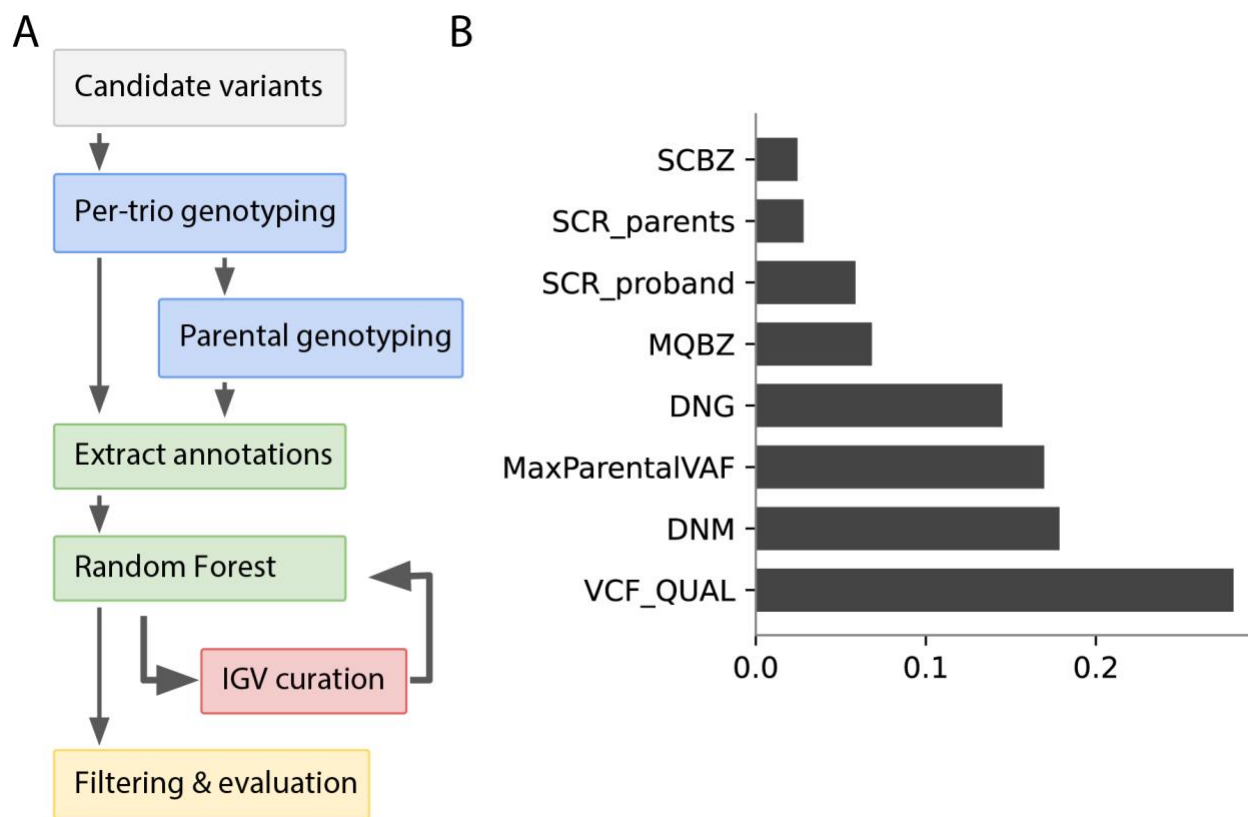

250  
 251 Calling and quality control of *de novo* mutations. A) Flow diagram illustrating the calling and quality control  
 252 process. B) Relative importance of features included in the random forest model used for quality control.  
 253 SCBZ: Mann-Whitney U-z test of number of soft-clips in variant reads; SCR: number of soft-clipped reads;  
 254 MQBZ: Mann-Whitney U-z test of mapping quality of variant reads; DNG: DeNovoGear score;  
 255 MaxParentalVAF: maximum variant allele frequency (VAF) observed across parents at this site; DNM: trio-  
 256 dnm2 score; VCF\_QUAL: variant quality as presented in the VCF QUAL column from GATK.

257 Figure S8

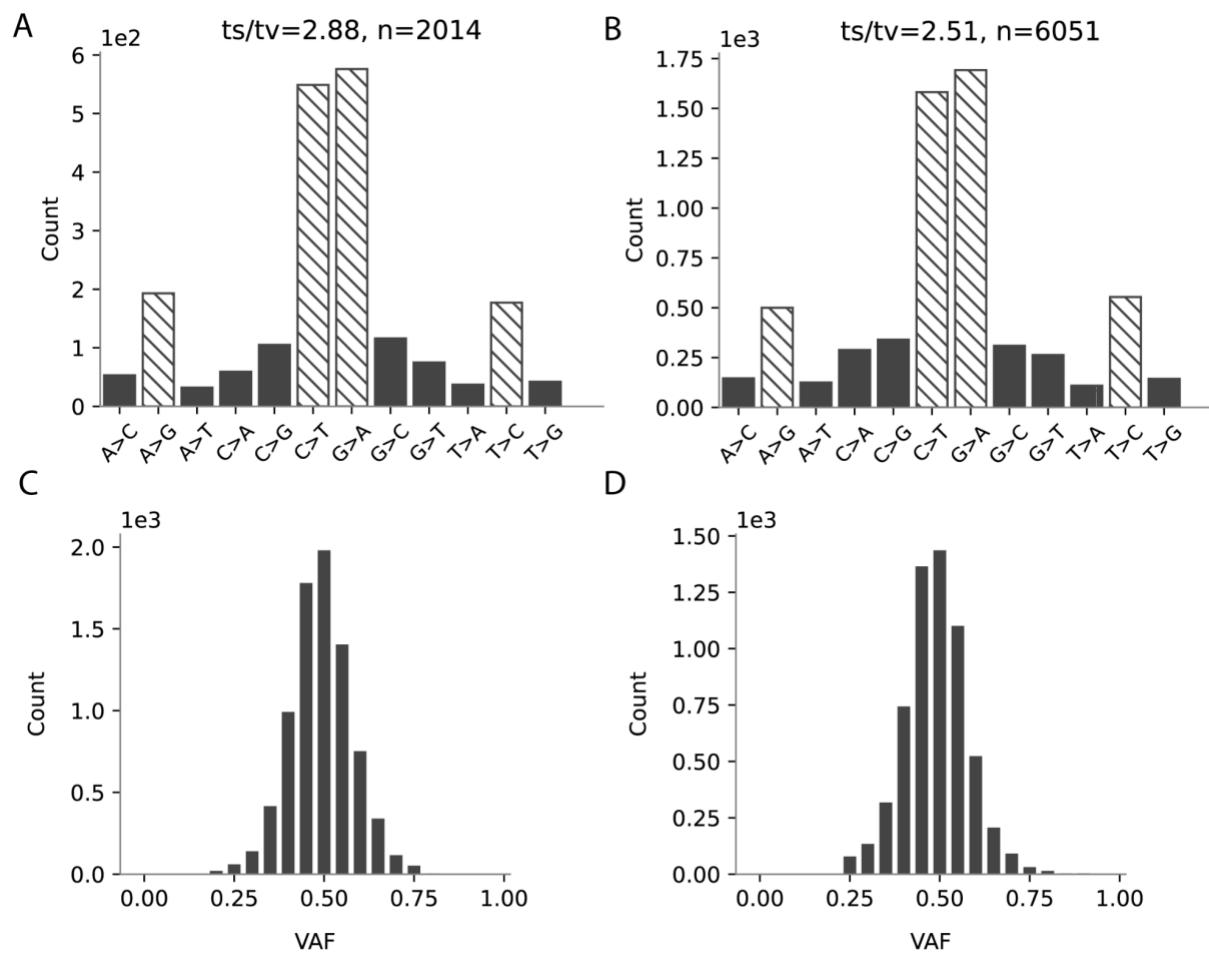

258  
 259  
 260  
 261  
 262  
 263

*De novo* mutation spectrum for single nucleotide variants in ALSPAC (A) and MCS (B). The hashed bars are transitions and the black bars transversions.  $ts/tv$  = transition/transversion ratio. Distribution of variant allele fraction (VAF) in ALSPAC (C) and MCS (D).

264 Figure S9

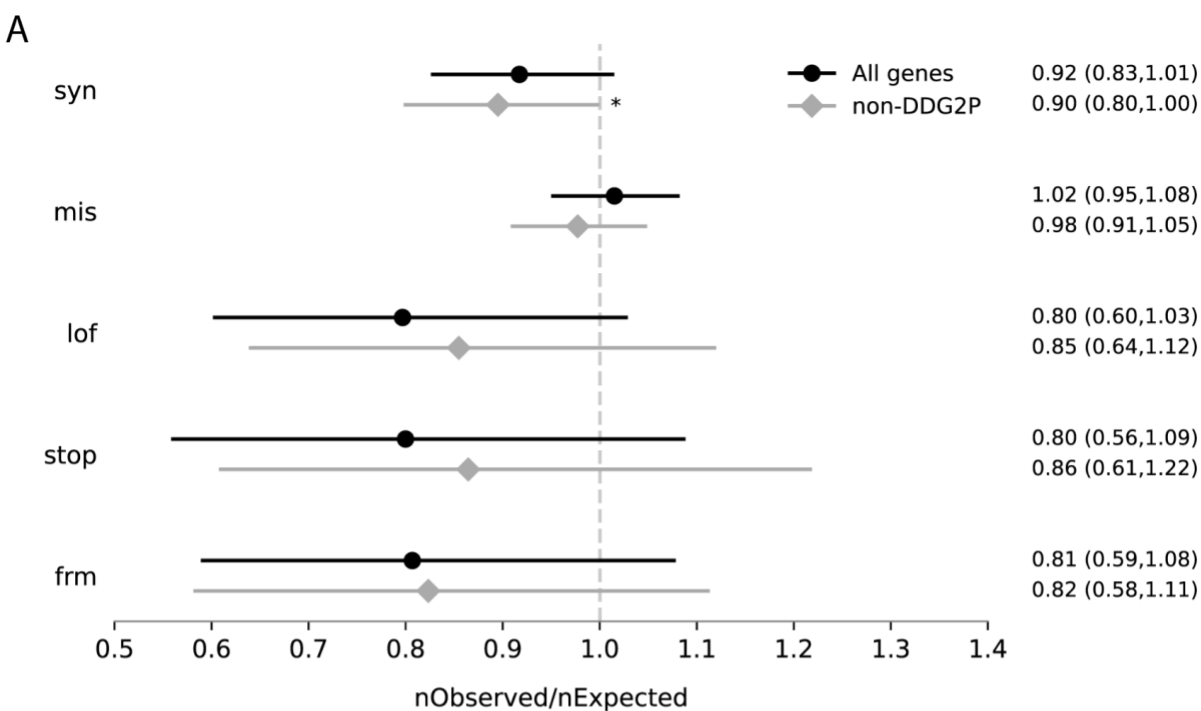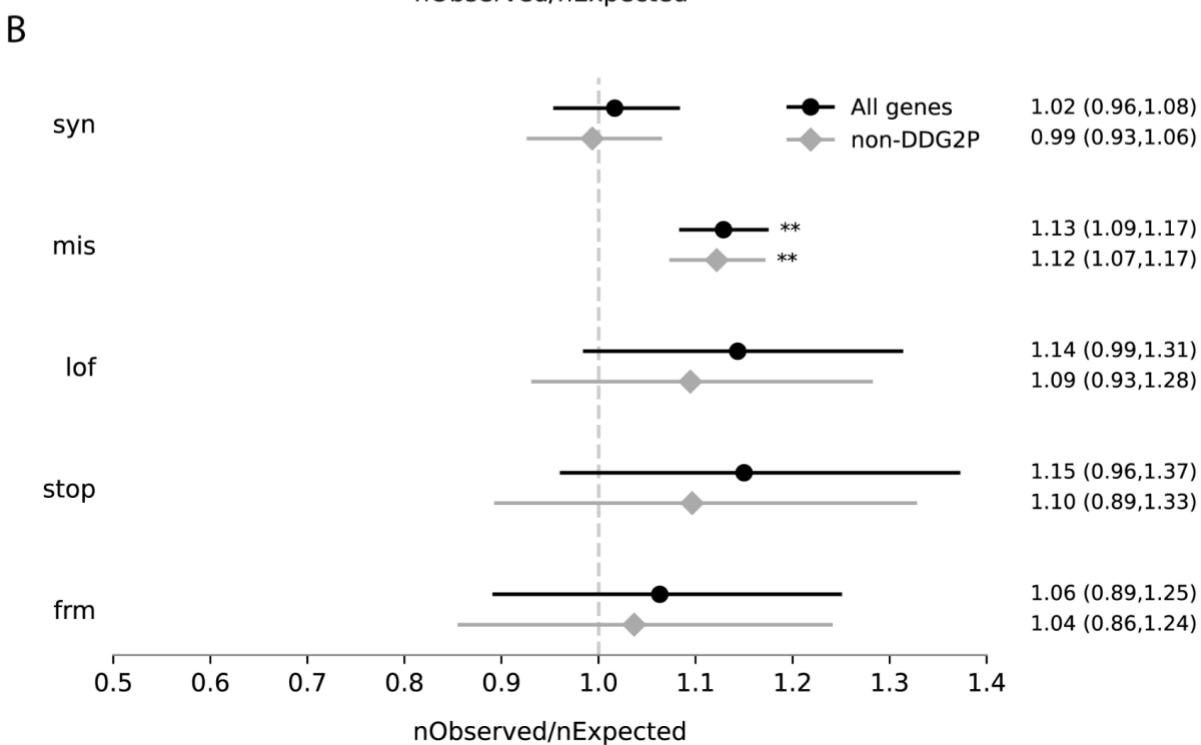

265  
 266 Observed vs expected number of de novo mutations in ALSPAC (A) and MCS (B) with 95% confidence  
 267 intervals and Poisson test significance threshold of  $p < 0.05$  (\*) and  $p < 0.01$  (\*\*). The considered mutations  
 268 types were: synonymous (syn), missense (mis), loss of function (lof), stop gained (stop) and frameshift  
 269 indels (frm).



## 270 Supplementary Note 1: IQ imputation in ALSPAC

### 271 Imputing IQ using SoftImpute

272 IQ was measured in ALSPAC at ages 4, 8, and 16 via psychometric testing administered in an in-  
273 person visit. Of the 8,804 children in the study with SNP array data, 6,496 had IQ measured at  
274 least once, with the lowest attendance at age 4 and relatively higher attendance at ages 8 and 16  
275 (Extended Data Figure 1A). IQ measures were highly correlated between ages, with pairwise  
276 correlations ranging from 0.51 (between ages 4 and 16) to 0.63 (between ages 4 and 8).

277  
278 In order to address nonresponse bias and increase our phenotyped sample size, we imputed  
279 missing IQ values across ages for all individuals with at least one IQ measurement and at least  
280 20% of variables considered for the imputation having nonmissing values per individual using  
281 SoftImpute<sup>11</sup>, an imputation algorithm that leverages the correlation structure across selected  
282 related variables to simultaneously impute all missing phenotype values. We first sought to  
283 identify a set of variables that maximize the imputation accuracy. We assessed three groups of  
284 variables: 1) the two other IQ measures, sex, parental income, and birth weight (base set), 2) the  
285 base set as well as a range of variables measured across life including additional cognitive and  
286 behavioral assessments (expanded set) (see Methods), and 3) the expanded set without the base  
287 set of variables (auxiliary set). To assess imputation quality for each of these three imputation  
288 strategies, we masked 100 measured IQ values at a given age and compared how the measured  
289 values compare to the imputed values.

290  
291 The highest correlations were observed in the expanded set across ages (Extended Data Figure  
292 1B). Importantly, we observed a median correlation of 0.61 for imputation accuracy for IQ at age  
293 4, where we have the fewest phenotyped individuals. When using the auxiliary set of variables,  
294 the performance at age 4 and age 8 was similar to that when using the base set, but performance  
295 was markedly worse at age 16 with a median correlation difference of 0.24 ( $p < .05$  Wilcoxon rank-  
296 sum test). These results suggest the auxiliary variables improved imputation most in the younger  
297 ages likely due to most of them being measured early in childhood, while at age 16 the base set  
298 contained the majority of the information that informed the imputation. Reassuringly, we observed  
299 consistent and accurate imputation across ages and used imputed IQ derived from the expanded  
300 set of variables throughout.

### 301 Common variant heritability and genetic correlations of IQ across time

302 We then compared the common variant genetic architecture of the imputed IQ values across  
303 ages. We conducted genome-wide association studies (GWASs) on IQ measurements at each  
304 age in an unrelated set of individuals inferred to have European genetic ancestry ( $n=6,495$ )  
305 (Methods). We used GREML-LDMS to calculate heritabilities and genetic correlations between  
306 the three GWASs. We found significant heritabilities for all traits, with  $h^2$  estimates between 0.46-  
307 0.56 (Table S2). Additionally, we found significant genetic correlations between all of the traits,  
308 with none showing significant difference from an  $r_g = 1$  (Table S2). These estimates of childhood  
309 IQ are concordant with previous estimates of SNP heritabilities ranging from 0.22-0.72<sup>12,13</sup>.

310

311 We additionally used LD score regression to calculate genetic correlations between the three  
312 GWASs and external GWASs of EA<sup>7</sup> and the cognitive and non-cognitive components of EA (EA-  
313 Cog and EA-nonCog)<sup>14</sup>. We found all genetic correlations were significant, with the correlations  
314 for EA and EA-Cog being consistently high ( $r_g > 0.85$ ) (Table S3). In contrast, the genetic  
315 correlations with EA-nonCog were lower (0.42-0.63) and significantly less than 1, consistent with  
316 the lower genetic correlation estimates between childhood IQ and EA-nonCog relative to that with  
317 EA-Cog previously observed<sup>14</sup>. Overall, these results indicated the common variant genetic  
318 architecture of measured+imputed IQ was highly similar across ages and to those of cognitive  
319 performance and educational attainment GWASs in directly-measured external samples.  
320

## 321 Supplementary Note 2: Effects of polygenic scores and rare variant burden 322 on academic performance measures in ALSPAC

323  
324 As a complementary approach, we assessed the influence of the PGIs and RVBs on academic  
325 performance in ALSPAC. In Year 6 and Year 9 (roughly ages 11 and 14, respectively; known as  
326 Key Stages 2 and 3 in the UK) children were administered three standardized exams covering  
327 English, Mathematics, and Science from which we derived a composite academic performance  
328 metric which we showed was measuring the same latent construct across time (Table S1;  
329 Methods). For children who had complete data for the three exams at both ages ( $n=3,895$ ), we  
330 assessed the contribution of the three PGIs to academic performance in a similar way to that  
331 described for IQ in the main text. We found significant ( $p < 1.1 \times 10^{-17}$ ) population effects for all PGIs  
332 and significant increases in effects with age for  $PGI_{EA}$  and  $PGI_{NonCog}$  ( $p < 2.1 \times 10^{-8}$ ) (Extended Data  
333 Figure 2, Table S5). In a trio analysis ( $n=3,024$ ), we found evidence for direct genetic effects of  
334  $PGI_{EA}$  and  $PGI_{Cog}$  on academic performance (Extended Data Figure 2), consistent with previous  
335 work in other cohorts<sup>19</sup>. Though all of the PGI-by-age interactions were positive, only the  $PGI_{EA}$   
336 showed a significant increase in direct effects ( $p=0.014$ ), likely due to the reduction in power of  
337 the decreased sample size and the narrower age range considered. However, broadly these  
338 results for the impact of common genetic variation on academic performance mirror what we  
339 observed for IQ. For  $RVB_{pLoF}$  and  $RVB_{Missense}$ , we found that they were significantly negatively  
340 associated with academic performance at age 11 but their effects attenuated with age (Extended  
341 Data Figure 4, Table S7).

## 342 Supplementary Note 3: Differential effects of rare variants in different gene 343 sets on IQ

344 We assessed whether the effects of rare variants on IQ differed according to the expression  
345 patterns of the genes in which they lie. Prior GWAS studies suggest that genes overlapping loci  
346 associated with intelligence and educational attainment are enriched for expression in brain<sup>7,9</sup>, as  
347 expected, and that genes associated with educational attainment showed on average relatively  
348 higher expression in prenatal rather than postnatal brain<sup>7</sup>. Similarly, genes implicated in autism  
349 by rare variants are also enriched for expression in prenatal brain<sup>15</sup>, as are those associated with  
350 neurodevelopmental disorders<sup>16</sup>. We recalculated RVB stratified by genes' assignments to co-

351 expressed modules enriched for expression in prenatal brain (n genes = 6,808), postnatal brain  
352 (6,078), or undetected in brain (3,028)<sup>17</sup>. We found that RVBs in the non-brain genes were not  
353 associated with IQ (Extended Data Figure 5A). In contrast,  $RVB_{pLoF}$  and  $RVB_{Missense}$  in the prenatal  
354 and postnatal gene sets were associated with IQ with main effects of similar magnitudes. In the  
355 prenatal gene set,  $RVB_{pLoF}$  had a significant interaction with age pre- and post-imputation  
356 ( $p < 0.05/3$ ) and  $RVB_{Missense}$  had a nominally significant interaction post-imputation ( $p < 0.05$ ). In  
357 contrast, we found only a nominally significant age interaction for  $RVB_{pLoF}$  in postnatal genes post-  
358 imputation, and no evidence for an age interaction pre-imputation. Hence, rare damaging variants  
359 in genes preferentially expressed in the prenatal brain showed a clear attenuation of the rare  
360 variant effect with age on IQ, but there is only mixed evidence for an age effect among genes  
361 preferentially expressed in postnatal brain.

362  
363 Similarly, we then assessed the association between RVBs stratified by expression patterns in  
364 the brain and academic performance in ALSPAC. As before, we detected no significant  
365 associations with any  $RVB_{Synonymous}$  and or RVB calculated in genes not detected in brain (Figure  
366 S5). We found significant associations between  $RVB_{pLoF}$  and  $RVB_{Missense}$  calculated in prenatal  
367 genes and academic performance, and  $RVB_{pLoF}$  calculated in postnatal genes. However, the  
368 patterns of attenuation were less clear:  $RVB_{pLoF}$  only showed significant attenuation with age when  
369 calculated in postnatal genes and  $RVB_{Missense}$  only showed a significant attenuation in prenatal  
370 genes. The confidence intervals on the age interaction estimates are large, particularly for the  
371 positive age interaction for  $RVB_{pLoF}$  calculated in prenatal genes where the estimate was nearly  
372 nominally significant, suggesting statistical power is a limitation.

373  
374 We next explored other gene sets that we hypothesized might have differential contributions to  
375 the  $RVB_{pLoF}$  association with IQ. In addition to the aforementioned gene sets defined by  
376 expression pattern, we considered gene sets ascertained for severe monogenic autosomal  
377 dominant (n genes = 337) or recessive NDCs (636) and genes prioritized via common variant  
378 genome-wide association studies of EA<sup>7</sup> (1,838), cognitive ability (1,912), and schizophrenia<sup>10</sup>  
379 (1,558). We calculated  $RVB_{pLoF}$  subsetted to only genes in a given gene set, and considered the  
380 main effect on IQ in ALSPAC estimated in a mixed-effects model, divided by the number of genes  
381 in the gene set, yielding per-gene effect estimates (Extended Data Figure 5B). Of the gene sets  
382 defined based on expression in the brain, only the prenatal gene set showed a modestly greater  
383 per-gene effect than the exome-wide average ( $p = 0.006$ , z test). The autosomal dominant NDC  
384 gene set had the largest per-gene effect, with the average per-gene effect being 12.3 times the  
385 exome-wide average, though not significantly different from it due to the large standard error of  
386 the estimate. In contrast, the autosomal recessive gene set did not show an association with IQ  
387 significantly different from the exome-wide average or even from zero. The next strongest  
388 association was that of the EA GWAS gene set, with an average per-gene effect 6.6 times greater  
389 than the exome-wide average ( $p = 1.5 \times 10^{-7}$ , z-test), followed by the gene sets defined based on  
390 GWASs for intelligence and schizophrenia (4.6 and 3.4 times the exome-wide average;  $p = 2.8 \times 10^{-4}$   
391 and 0.048 respectively).

392  
393 The differences in average rare variant effect sizes per gene between gene sets observed in could  
394 simply be driven by their different distributions of underlying selection coefficients (Extended Data

395 Figure 5C), since the majority of the  $RVB_{pLoF}$  signal is due to variants in highly constrained genes  
396 (Extended Data Figure 6A). In order to assess the enrichment of per-gene effects in a gene set  
397 relative to similarly constrained genes, for each gene set, we simulated 100 gene sets of equal  
398 size with matching underlying selection coefficient distributions and pooled their effect estimates  
399 (see Supplementary Methods). Enrichment was defined as the ratio of the effect estimate for the  
400 original gene set to the pooled estimate from the randomly sampled gene sets. The autosomal  
401 dominant NDC gene set did not show any enrichment, suggesting that the relatively high number  
402 of evolutionarily constrained genes in this gene set is the main driver of the large per-gene effect  
403 (Extended Data Figure 5D). In contrast, the only Bonferroni-significant enrichment was observed  
404 for the EA GWAS gene set (ratio=2.47;  $p=1.6 \times 10^{-4}$ ), with nominal enrichments for the intelligence  
405 and prenatal gene sets and a relative depletion of signal in the non-brain gene set. We observed  
406 similar results using the composite cognitive performance measure in MCS, albeit with attenuated  
407 levels of enrichment compared to ALSPAC that were nominally significant only for the EA GWAS  
408 gene set (Figure S6). These results suggest that genes prioritized via the EA GWAS contribute  
409 more variance to the RVB associations with childhood IQ than expected given their level of  
410 constraint, and potentially also for those prioritized via the intelligence GWAS and genes  
411 preferentially expressed in prenatal brain.

412  
413 Given the large enrichment and per-gene effects observed for the  $RVB_{pLoF}$  in the EA gene sets,  
414 we then sought to compare how different gene inclusion criteria impact their associations on IQ  
415 in ALSPAC. We previously used a 5% FDR cutoff from the prioritized genes in Lee et al.  
416 regardless of whether the gene was the closest gene to the significant SNPs informing the  
417 prioritization. We additionally considered all combinations of using a 1% and 0.1% FDR cutoff as  
418 well as restricting to only genes that were the closest genes to the GWAS significant SNPs,  
419 resulting in six gene sets. Both when considering all genes or only closest genes, using more  
420 stringent FDR thresholds led to stronger per-gene standardized effects (Extended Data Figure  
421 5E). When restricting to only closest genes, the point estimates of the effects increased  
422 substantially for all FDR thresholds. For example, when comparing the gene sets with an FDR  
423 cutoff of 0.1%, the per-gene standardized effects increased by 51% when restricting to the closest  
424 genes, i.e. the per-gene variance explained was 2.3 times greater, though the standard errors  
425 increased substantially due to the decrease in the gene set size. As there was modest overlap  
426 with the AD NDC gene set, we further considered the EA gene sets after excluding genes  
427 overlapping the AD NDC gene set to ensure they were not driving the associations. After doing  
428 so, the per-gene effect point estimates all became stronger though not significantly so (Extended  
429 Data Figure 5E), likely due to the relative rarity of damaging variants in the highly constrained  
430 NDC genes. These results were recapitulated using a composite measure of cognitive  
431 performance in MCS (Figure S6C). We conclude that genes prioritized via common variant GWAS  
432 of cognitive traits in adult populations converge with those that have outsized effects on IQ in  
433 early life.

434

#### 435 Supplementary Note 4: Relative contributions of deleterious pLoF *de novo* 436 and inherited variants to IQ

437 We sought to compare the relative contribution of inherited versus *de novo* pLoF variants in  
438 evolutionarily constrained genes ( $n = 3160$  autosomal genes) to IQ in ALSPAC and our composite  
439 cognitive performance measure in MCS. To simplify interpretability of the influence of *de novo*  
440 variants in such genes on these phenotypes, we first compared the effect of the  $RVB_{pLoF}$   
441 previously used to the effect of the the number of evolutionarily constrained genes in which an  
442 individual carries a pLoF variant (constrained pLoF count). The standardized effect of  $RVB_{pLoF}$   
443 and constrained pLoF count on IQ were not significantly different from each other at any age in  
444 ALSPAC, though the latter consistently produced slightly weaker effects (Extended Data Figure  
445 6A). Thus, for this analysis, we considered the associations of constrained pLoF count with  
446 measures of cognition.

447  
448 We then compared the unstandardized effects of the constrained pLoF count of putatively  
449 inherited versus robust *de novo* variants on IQ in the fully exome-sequenced trios from ALSPAC  
450 ( $n=958$ ) using mixed-effect modeling. The *de novo* constrained pLoF count had a larger point  
451 estimate, but it was not significantly different from that for inherited variants (Extended Data Figure  
452 6B). However, power may have limited the ability to estimate a difference in the effects, as only  
453 1.8% of children had at least one *de novo* pLoF in a constrained gene, compared to 12% with at  
454 least one inherited pLoF in a constrained gene. The age interaction with *de novo* constrained  
455 pLoF count was nonsignificant, though in a concordant direction with the inherited pLoF count  
456 and the total pLoF constrained count (Extended Data Figure 6B). The ratio of the main effect to  
457 the age interaction effect was highly concordant between *de novo* mutations and inherited  
458 variants (18.6 and 17.9, respectively), potentially suggesting the age attenuation of the influence  
459 of rare variants acted similarly for *de novo* and putatively inherited variants, though the error bars  
460 are large.

461  
462 The variance of the constrained pLoF count for *de novo* mutations was significantly lower than  
463 that for inherited variants (0.018 versus 0.14,  $p < 10^{-10}$  F test). The variance in IQ explained by the  
464 constrained pLoF count of inherited variants was nearly equal to that of all variants and about four  
465 times that of the *de novo* pLoF count (Extended Data Figure 6C). As the inherited and *de novo*  
466 constrained pLoF counts were uncorrelated ( $r = -0.04$ ,  $p = 0.13$ ) and the estimated age interaction  
467 effects were proportionally consistent, these results suggested that the inherited constrained pLoF  
468 count explained between 3.5-4 times more variance than the *de novo* constrained pLoF count in  
469 IQ across development in this cohort. Virtually identical results were observed when conducting  
470 the same analysis on cognitive performance in MCS (Figure S1).

471  
472 However, this analysis has several limitations. First, our *de novo* variant calling was calibrated to  
473 maximise specificity, possibly at the expense of sensitivity, so some of the putatively inherited  
474 variants may in fact be *de novo*. Second, the fact that children in full trios in ALSPAC and MCS  
475 are biased towards coming from households with higher educational attainment (e.g. effect of  
476 maternal and paternal EA on being in a full trio in ALSPAC, odds ratio = 1.08 and 1.12  
477 respectively,  $p < 10^{-15}$  for both) and older parents (maternal age at birth OR = 1.029,  $p = 0.00653$  in

478 ALSPAC; OR=1.078,  $p=5 \times 10^{-15}$  in MCS) likely means we have overestimated the fraction of the  
479 rare variant effect that is due to *de novo* mutations compared to an unbiased sample. This implies  
480 that the trio parents are likely to have fewer inherited rare variants reducing cognitive ability and  
481 that they probably pass on more *de novo* mutations due to having, on average, higher parental  
482 age<sup>18,19</sup>.

483

## 484 Supplementary Note 5: Quantile regression results using cognitive ability 485 measures in MCS and UK Biobank

486

487 As additional replication for the quantile regression results (Figure 3), we then considered the  
488 association between  $PGI_{EA}$  and a single measure of cognitive performance from each of MCS  
489 and UK Biobank. In MCS, cognitive tests were administered at multiple ages, but previous work  
490 showed that these are not longitudinally invariant<sup>47</sup>, so we instead extracted a single composite  
491 cognitive measure from the tests administered at ages 3 and 7 (see Methods) to represent overall  
492 cognitive performance in early childhood. In UK Biobank, we used the results for the verbal-  
493 numerical reasoning test (sometimes called “fluid intelligence”) conducted at baseline, to  
494 represent adult cognitive performance. We hypothesized that we would see relatively uniform  
495 effects across quantiles of early childhood cognitive performance measured in MCS, as we did  
496 for IQ in ALSPAC at age 4 (Figure S2). Given the differential age interactions across quantiles  
497 observed in ALSPAC (namely the increasing effect with age that is seen only in the top half of the  
498 distribution), we predicted that, in UK Biobank adults, the  $PGI_{EA}$  effects would be markedly  
499 stronger at the top 5% and median than the bottom 5%. Our results were concordant with these  
500 two predictions (Extended Data Figure 7B): neither the population ( $n=5,920$ ) nor direct ( $n=5,309$ )  
501 effects were statistically different across quantiles in MCS, while we found significant  
502 heterogeneity in UK Biobank when examining both the population effect ( $n=101,232$ ) and direct  
503 effect ( $n=11,859$ ), with the direct effect at the top 5% being 1.62 times greater than that at the  
504 bottom 5% ( $p=0.0084$ ).

505

506 We then considered the association between the  $RVB_{pLoF}$  and  $RVB_{Missense}$  and measures of  
507 cognitive performance in MCS ( $n=5,666$ ) and UK Biobank ( $n=101,232$ ). Given the heterogeneity  
508 of effects on IQ observed at age 4 in ALSPAC (Figure S4), we hypothesized that in MCS, we  
509 would find stronger effects for  $RVB_{pLoF}$  at the bottom 5% of our composite cognitive performance  
510 measure from early childhood. In UK Biobank, we predicted that the differences across quantiles  
511 would be minimal since we observed increasingly uniform effects across the quantiles by age 16  
512 in ALSPAC (Figure S4). Our findings were concordant with these two predictions: the bottom 5%  
513 had an effect 1.82-times stronger than the median and 2.4-times stronger than the 95th percentile  
514 in MCS ( $p=0.019$  and  $0.011$ , respectively), while we found no significant differences in effects  
515 across quantiles in UK Biobank (Extended Data Figure 7B). Collectively, these results support  
516 our  $PGI$  and  $RVB$  findings using ALSPAC IQ measures.

517

## 518 Supplementary Note 6: Results of models including genetic measures, 519 parental education, and perinatal exposures

520  
521 We first considered the effects of genetic scores, parental education and perinatal factors  
522 (maternal health and weeks born preterm) on mean IQ in ALSPAC using mixed-effects linear  
523 regression. Since perinatal factors considered are both associated with lower parental EA<sup>50-52</sup>,  
524 and parental EA is correlated with both the parents' and the child's genetics, the effects of these  
525 various factors on the child's cognitive ability were likely not independent. Thus, we considered a  
526 model in which we jointly fit parental EA and the perinatal exposures together with the genetic  
527 scores that showed significant effects in Figure 1 and 2, namely offspring and parental  $PGI_{EA}$  and  
528 the child's  $RVB_{pLoF}$  and  $RVB_{Missense}$  (conditional estimates shown in orange in Figure 4A). For  
529 replication, we ran a linear regression of our composite cognitive performance measure in MCS  
530 against the genetic scores, parental education and weeks born preterm, omitting the 'maternal  
531 health' variable since the data were not readily available (Extended Data Figure 10).

532  
533 In ALSPAC, incremental  $R^2$  of the joint model (excluding weeks born preterm due to the lower  
534 sample size) relative to a baseline model with sex and genetic 10 PCs was 22.8% at age 4, 21.2%  
535 at age 8 ( $p=0.29$  for a z-test for difference in variance explained compared to age 4) and 25.6%  
536 at age 16 ( $p=0.073$  and  $0.0045$  relative to age 4 and 8 respectively, z test). In MCS, the  
537 incremental  $R^2$  of the joint model was 16.7% relative to the baseline. We found that when jointly  
538 fit with the other variables, the parental  $PGI_{EA}$  associations became nonsignificant in both cohorts,  
539 though the child's direct effect estimate did not significantly change (Figure 4A top, Extended Data  
540 Figure 10A). Similarly, the effects of the child's  $RVB_{pLoF}$  and  $RVB_{Missense}$  on IQ did not significantly  
541 attenuate in either cohort after controlling for these different exposure variables and  $PGI_{EA}$ . The  
542 association between weeks born preterm and IQ was no longer significant in the conditional  
543 analysis in ALSPAC, though this may be due to reduced power in the joint model, whereas in  
544 MCS it remained significant. Maternal and paternal EA showed similar effect sizes to each other  
545 in both cohorts, which were also similar to those captured by the direct genetic effect of the child's  
546  $PGI_{EA}$ . These results suggest, apart from the parental PGIs, effect estimates were largely  
547 unaffected in a conditional analysis.

548  
549 We next considered the influence of genetic scores, parental education and perinatal factors on  
550 the different quantiles of the distribution. In ALSPAC, considering each of the variables separately  
551 (Figure 4B, marginal estimates), we found that paternal and maternal education had similar  
552 magnitudes of main effects as well as uniform effects across quantiles, and we detected a  
553 nominally significant positive age interaction ( $p=0.029$ ) for paternal education at the 95th  
554 percentile (Figure 4B), although the latter was not replicated in MCS, potentially due to the  
555 different demographics of this cohort. We found substantial heterogeneity in the effect of weeks  
556 born preterm in ALSPAC; this variable showed highly significant main effects at the 95th  
557 percentile (effect size =  $-0.120$ ,  $p=8.44 \times 10^{-6}$ ) that significantly attenuated with age ( $p=0.00421$ ),  
558 as previously observed when examining the effect on mean IQ (Figure 4A bottom), while we  
559 detected no significant effects at the 5th percentile (effect size =  $-0.022$ ,  $p=0.389$ ). However, in  
560 MCS we did not find significant heterogeneity of effects of this variable at the tails (Extended Data

561 Figure 10B). This difference may be because all the ALSPAC children in this subsample were  
562 born after 32 weeks' gestation, thus excluding very and extremely premature babies who might  
563 be expected to have the greatest cognitive deficits<sup>8</sup>. In contrast to the prematurity result, we  
564 detected significant main effects of maternal illness at the 5th percentile ( $p=5.97 \times 10^{-8}$ ) in ALSPAC  
565 that attenuated with age ( $p=5.06 \times 10^{-4}$ ), while the main effect at the 95th percentile was  
566 nonsignificant. These results suggest that different perinatal factors may have varying impacts  
567 across the IQ distribution, with some factors predominantly affecting the upper or lower tails of  
568 cognitive ability.

569  
570 We then further explored the differential effects on the different quantiles of the IQ distribution in  
571 a joint model of the genetic and other exposures (Figure 4B, conditional estimates), excluding  
572 "weeks born preterm" in ALSPAC due to high missingness. In ALSPAC, we detected significant  
573 maternal  $PGI_{EA}$  main effects on the 5th and 50th percentiles of the IQ distribution (Figure 4B)  
574 which were not observed in the conditional analysis of mean IQ (Figure 4A), suggesting the  
575 heterogeneous effects across the IQ distribution may have masked these associations. This result  
576 suggests that the mother's  $PGI_{EA}$ , independently of its influence on the mother's actualized EA,  
577 may be associated with the child's IQ at the lower tail of the IQ distribution either due to genetic  
578 nurture or confounding tagged by the paternal  $PGI_{EA}$ . However, we did not replicate this finding  
579 in MCS (Extended Data Figure 10B). Maternal EA did not show heterogeneity of main effects  
580 across the IQ distribution in either cohort (Figure 4B top, Extended Data Figure 10B). However,  
581 in ALSPAC but not MCS, paternal EA did show a significant positive age interaction at the 95th  
582 percentile (Figure 4B bottom) which was not observed when considering the effect on mean IQ  
583 (Figure 4A bottom), suggesting the influence of paternal EA on IQ increases at later stages of  
584 development among those at the top of the IQ distribution. Thus, in summary, our results suggest  
585 that the relative influences of factors that best predict which children will have cognitive difficulties  
586 or will excel cognitively across childhood differ from those that best predict average IQ. However,  
587 given that some specific findings did not replicate across cohorts, there is a need to explore this  
588 in larger sample sizes.

## 589 Supplementary Note 7: Results of quantile regressions on genetic scores 590 pre- versus post-imputation of IQ

591 The results from the quantile regressions in Figure 3 were based on IQ after imputation of missing  
592 values (Supplementary Note 1). We found that when analyzing pre-imputation IQ, some quantile  
593 regression estimates were not concordant with the observed effects post-imputation, particularly  
594 at age 4. Specifically, we found that, in cross-sectional analyses, there was no significant  
595 association between  $PGI_{EA}$  and  $PGI_{CoG}$  and IQ at the 5th percentile, but a large effect at the 95th  
596 percentile (Figure S2A, Table S8). However, by age 8 and 16, where the missingness was  
597 substantially lower, the pre-imputation estimates were similar to the post-imputation estimates  
598 (Figure S2A versus B). When analyzing the pre-imputation measures using mixed-effects quantile  
599 regression, this discordant effect at age 4 led to an observed positive age interaction at the 5th  
600 percentile, a nominal interaction effect at 50th percentile, and none at 95th percentile (Figure S3).  
601 However, in a direct effect analysis, the effect at the 95th percentile was greatly attenuated (Figure  
602 S3) and the age interactions generally mirrored the results observed post-imputation (Figure S3)



603 versus Figure 3B). Specifically, when examining the direct effects, there was no age interaction  
604 effect at the 5th percentile for either PGI, but there were positive interaction effects at the 50th  
605 percentile for both PGIs and at the 95th percentile for PGI<sub>Cog</sub> (Figure S3). These results suggest  
606 that ascertainment bias most likely strongly impacted the PGI results pre-imputation. The fact that  
607 we observed no significant population effect of these PGIs on the 5th percentile of the distribution  
608 at age 4 may be because power has been reduced by ascertainment biases in the IQ test  
609 conducted at this age; of the subsample of participants invited to complete this test, only 81%  
610 accepted, and it may be that those families who declined were particularly biased towards lower  
611 educational attainment. Additionally, children born very prematurely were excluded from the  
612 sample and these were likely to have lower IQ. However, after conditioning on parental PGIs, the  
613 results were largely concordant with the post-imputation analysis.

614  
615 The  $RVB_{pLoF}$  and  $RVB_{Missense}$  results pre-imputation (Figure S3-4) were qualitatively similar to the  
616 post-imputation results (Figure 3), with nominally significant larger main effects at the 5th  
617 percentile relative to the 95th and significant positive age interaction effects only detected at the  
618 lower half of the IQ distribution.

619

## 620 References

- 621 1. Koko, M. *et al.* Exome sequencing of UK birth cohorts. *Wellcome Open Research* (2024).
- 622 2. Ramu, A. *et al.* DeNovoGear: de novo indel and point mutation discovery and phasing. *Nat.*  
623 *Methods* **10**, 985–987 (2013).
- 624 3. Robinson, J. T. *et al.* Integrative genomics viewer. *Nat. Biotechnol.* **29**, 24–26 (2011).
- 625 4. Samocha, K. E. *et al.* A framework for the interpretation of de novo mutation in human  
626 disease. *Nat. Genet.* **46**, 944–950 (2014).
- 627 5. Yang, J. *et al.* Genetic variance estimation with imputed variants finds negligible missing  
628 heritability for human height and body mass index. *Nat. Genet.* **47**, 1114–1120 (2015).
- 629 6. Bulik-Sullivan, B. *et al.* An atlas of genetic correlations across human diseases and traits.  
630 *Nat. Genet.* **47**, 1236–1241 (2015).
- 631 7. Lee, J. J. *et al.* Gene discovery and polygenic prediction from a genome-wide association  
632 study of educational attainment in 1.1 million individuals. *Nat. Genet.* **50**, 1112–1121 (2018).
- 633 8. DDG2P (Version 3.79). <https://panelapp.genomicsengland.co.uk/panels/484/>.
- 634 9. Savage, J. E. *et al.* Genome-wide association meta-analysis in 269,867 individuals identifies

- 635 new genetic and functional links to intelligence. *Nat. Genet.* **50**, 912–919 (2018).
- 636 10. Pardiñas, A. F. *et al.* Common schizophrenia alleles are enriched in mutation-intolerant  
637 genes and in regions under strong background selection. *Nat. Genet.* **50**, 381–389 (2018).
- 638 11. Hastie, T., Mazumder, R., Lee, J. D. & Zadeh, R. Matrix Completion and Low-Rank SVD via  
639 Fast Alternating Least Squares. *J. Mach. Learn. Res.* **16**, 3367–3402 (2015).
- 640 12. Benyamin, B. *et al.* Childhood intelligence is heritable, highly polygenic and associated with  
641 FBNP1L. *Mol. Psychiatry* **19**, 253–258 (2014).
- 642 13. Mollon, J. *et al.* Genetic influence on cognitive development between childhood and  
643 adulthood. *Mol. Psychiatry* **26**, 656–665 (2021).
- 644 14. Demange, P. A. *et al.* Investigating the genetic architecture of noncognitive skills using  
645 GWAS-by-subtraction. *Nat. Genet.* **53**, 35–44 (2021).
- 646 15. Satterstrom, F. K. *et al.* Large-Scale Exome Sequencing Study Implicates Both  
647 Developmental and Functional Changes in the Neurobiology of Autism. *Cell* **180**, 568–  
648 584.e23 (2020).
- 649 16. Huang, Q. Q. *et al.* Dissecting the contribution of common variants to risk of rare  
650 neurodevelopmental conditions. *bioRxiv* (2024) doi:10.1101/2024.03.05.24303772.
- 651 17. Li, M. *et al.* Integrative functional genomic analysis of human brain development and  
652 neuropsychiatric risks. *Science* **362**, (2018).
- 653 18. Kong, A. *et al.* Rate of de novo mutations and the importance of father’s age to disease risk.  
654 *Nature* **488**, 471–475 (2012).
- 655 19. Jónsson, H. *et al.* Parental influence on human germline de novo mutations in 1,548 trios  
656 from Iceland. *Nature* **549**, 519–522 (2017).
